# Supplementary material for: PTFE-Containing Coating Obtained on Ti by Spraying and PEO Pretreatment
Source: MDPI journal article supplement (doi:10.3390/coatings13071249), 2023-07-14
Supplement: s1 [file s1]

Archive with 1 entries (1 files):
- Supplementary figure.pdf
