# Supplementary figures and images for: PTFE-Containing Coating Obtained on Ti by Spraying and PEO Pretreatment
Source: MDPI journal article supplement (doi:10.3390/coatings13071249), 2023-07-14

## Supplementary Figure

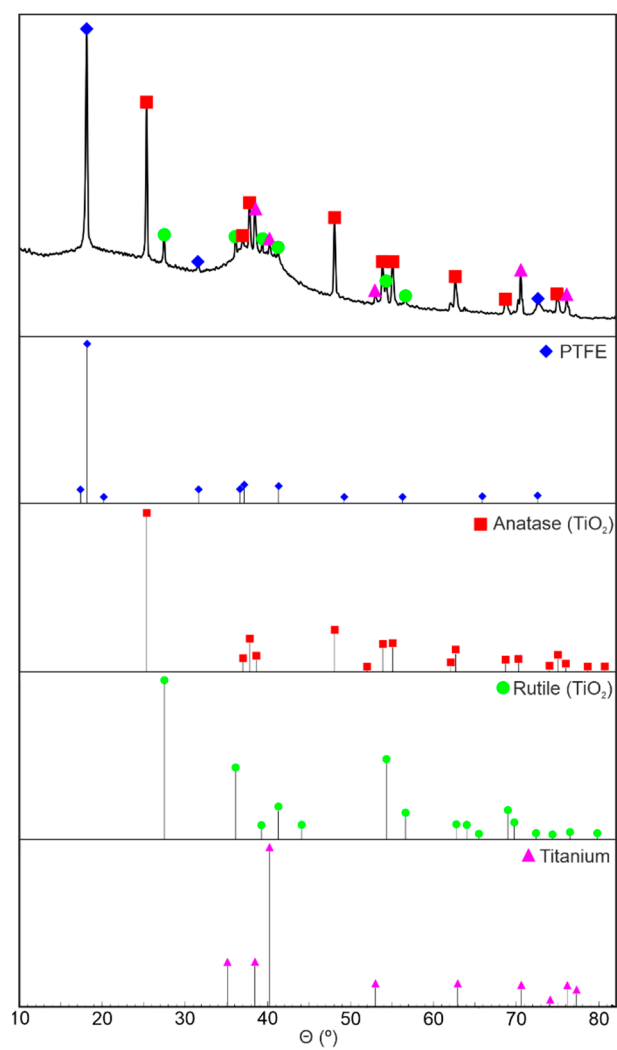

**Figure S1.** X-ray diffraction pattern of composite coating on VT1-0 titanium.

Supplement: s1 [file s1 › Supplementary figure.pdf]
